# Supplementary material for: Fabrication of Three-Dimensionally Deformable Metal Structures Using Precision Electroforming
Source: MDPI journal article supplement (doi:10.3390/mi13071046), 2022-06-30
Supplement: s1 [file s1]

# Supplementary Materials: Fabrication of Three-Dimensionally Deformable Metal Structures Using Precision Electroforming

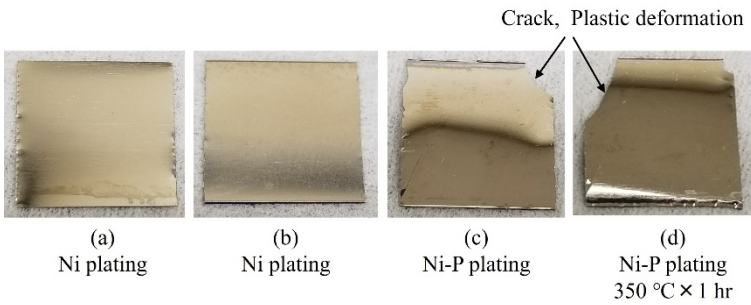

**Figure S1.** Simplified flexural evaluation of four types of Ni film samples (a–d). The Ni films in (a) and (b) were found to deform elastically and return to their original shapes without damage. The samples with Ni-P alloys in (c) and (d) cracked and broke while bending. In addition, they did not return to their original shapes.

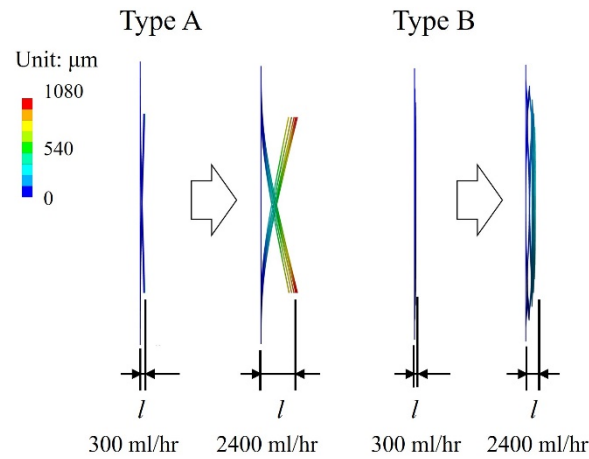

**Figure S2.** Simulation analysis results for the deformation of the Type A and B metal structures. The conditions used in this analysis are summarized in Table S1. The measured deformation and simulation results were compared. Under a flow rate of 300 ml/h, Type A showed a deformation (simulation value) of approximately 120  $\mu\text{m}$ , and the measurement result was 110  $\mu\text{m}$ , whereas Type B showed a deformation (simulation value) of approximately 40  $\mu\text{m}$ , and the measurement result was 40  $\mu\text{m}$ . Under a flow rate of 2400 ml/h, Type A showed a deformation (simulation value) of approximately 1080  $\mu\text{m}$ , and the measurement result was 820  $\mu\text{m}$ , whereas Type B showed a deformation (simulation value) of approximately 280  $\mu\text{m}$ , and the measurement result was 90  $\mu\text{m}$ . Thus, the simulation and measurement results agree well under the condition of a low flow rate.

**Table S1.** Deformation analysis conditions.

| Item               | Boundary Condition                        |
|--------------------|-------------------------------------------|
| Analysis model     | Axis-symmetric                            |
| Young's modulus    | 200 GPa                                   |
| Number of nodes    | 1,049,655                                 |
| Number of elements | 414,361                                   |
| Element type       | PLANE182 (2-D four-node structural solid) |
